# Supplementary material for: Enantiopure methoxetamine stereoisomers: chiral resolution, conformational analysis, UV-circular dichroism spectroscopy and electronic circular dichroism
Source: Royal Society of Chemistry journal article supplement (doi:10.1039/d0nj05192f), 2021-01-01
Supplement: d0nj05192f1.pdf [file d0nj05192f1.pdf]

Supporting Information

**Enantiopure methoxetamine stereoisomers: Chiral resolution, conformational analysis, UV-circular dichroism spectroscopy and electronic circular dichroism**

**Kun Won Lee<sup>1,†</sup>, Ahmed H.E. Hassan<sup>2,3,†</sup>, Youngdo Jeong<sup>1</sup>, Seolmin Yoon<sup>1</sup>, Seung-Hwan Kim<sup>1</sup>, Cheol Jung Lee, Hye Rim Jeon<sup>1</sup>, Suk Woo Chang<sup>1</sup>, Ji-Young Kim<sup>1</sup>, Dae Sik Jang<sup>1</sup>, Hee Jin Kim<sup>4</sup>, Jae Hoon Cheong<sup>5</sup>, Yong Sup Lee<sup>1,3\*</sup>**

<sup>1</sup> *Department of Life and Nanopharmaceutical Sciences, Kyung Hee University, Seoul 02447, Korea*

<sup>2</sup> *Department of Medicinal Chemistry, Faculty of Pharmacy, Mansoura University, Mansoura 35516, Egypt*

<sup>3</sup> *Medicinal Chemistry Laboratory, Department of Pharmacy, College of Pharmacy, Kyung Hee University, Seoul 02447, Korea*

<sup>4</sup> *Uimyung Research Institute for Neuroscience, College of Pharmacy, Sahmyook University, Seoul, Republic of Korea*

<sup>5</sup> *School of Pharmacy, Jeonbuk National University, 567 Baekje-daero, Deokjin-gu, Jeonju-si, Jeollabuk-do 54896, Republic of Korea*

† Both of Ahmed H.E. Hassan and Kun Won Lee contributed equally to this work and should be first authors.

\***Corresponding author:** Yong Sup Lee (email: kyslee@khu.ac.kr)

**Column Description**

| <p><b>AMYLOSE-BASED</b></p> 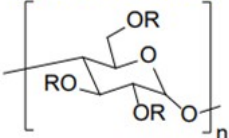 <p><b>Immobilized on 3 μm silica gel</b></p>                         |                                                                                                                                                                                   | <p><b>CELLULOSE-BASED</b></p>  <p><b>Immobilized on 3 μm silica gel</b></p>                                               |
|------------------------------------------------------------------------------------------------------------------------------------------------------------------------------------|-----------------------------------------------------------------------------------------------------------------------------------------------------------------------------------|--------------------------------------------------------------------------------------------------------------------------------------------------------------------------------------------------------------|
| <p><b>CHIRALPAK® IA-3</b></p> <p>Amylose tris(3,5-dimethylphenylcarbamate)</p>  <p>R =</p>        | <p><b>CHIRALPAK® ID-3</b></p> <p>Amylose tris(3-chlorophenylcarbamate)</p>  <p>R =</p>           | <p><b>CHIRALPAK® IB-3</b><br/><b>CHIRALPAK® IB N-3</b></p> <p>Cellulose tris(3,5-dimethylphenylcarbamate)</p>  <p>R =</p> |
| <p><b>CHIRALPAK® IE-3</b></p> <p>Amylose tris(3,5-dichlorophenylcarbamate)</p>  <p>R =</p>       | <p><b>CHIRALPAK® IF-3</b></p> <p>Amylose tris(3-chloro-4-methylphenylcarbamate)</p>  <p>R =</p> | <p><b>CHIRALPAK® IC-3</b></p> <p>Cellulose tris(3,5-dichlorophenylcarbamate)</p>  <p>R =</p>                             |
| <p><b>CHIRALPAK® IG-3</b></p> <p>Amylose tris(3-chloro-5-methylphenylcarbamate)</p>  <p>R =</p> | <p><b>CHIRALPAK® IH-3</b></p> <p>Amylose tris[(S)-α-methylbenzylcarbamate]</p>  <p>R =</p>     |                                                                                                                                                                                                              |

**Fig S1.** Chemical compositions of the stationary phases used to establish chiral chromatographic conditions

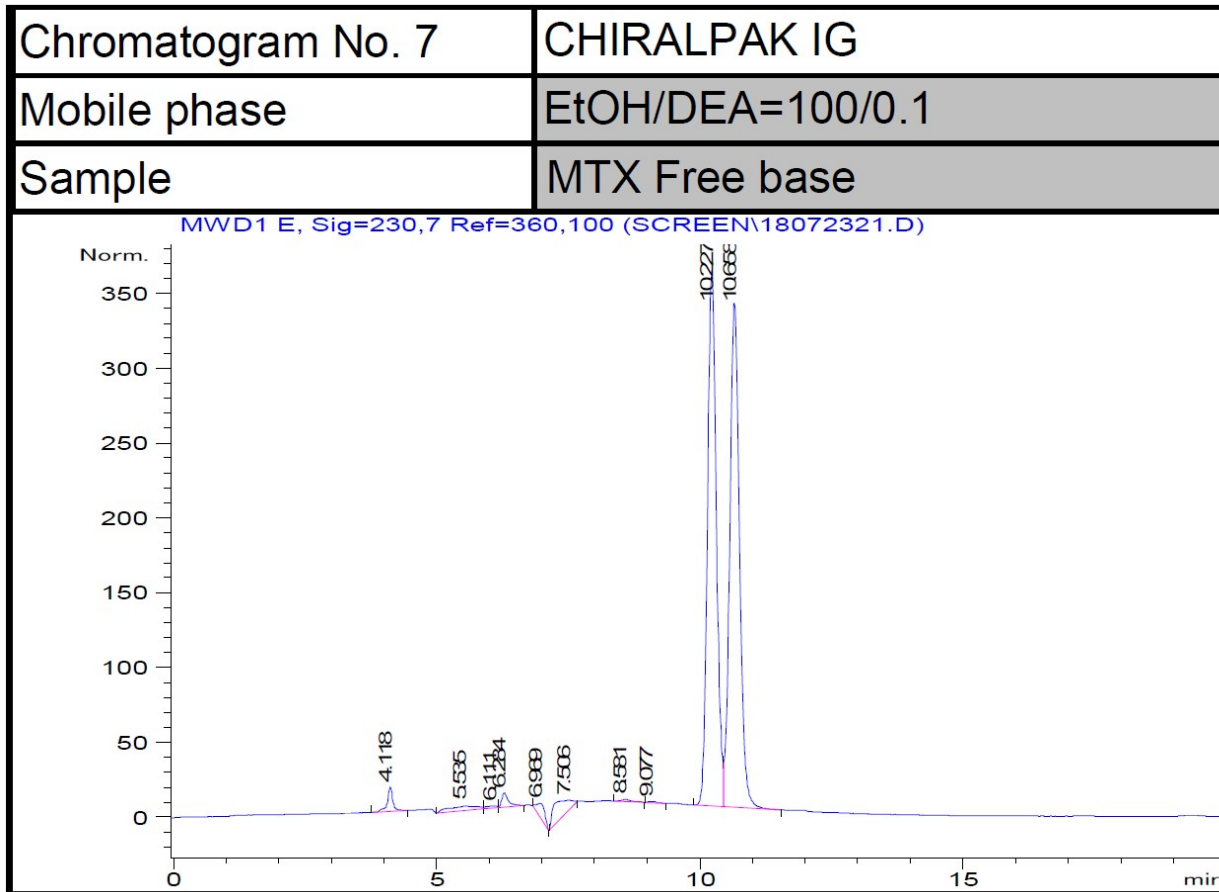

**Figure S2.** Chromatogram of enantiomers of (*rac*)-MXE free base form resolved on CHIRALPAK® IG-3 stationary phase using ethanol/diethylamine (100/0.1) as a mobile phase

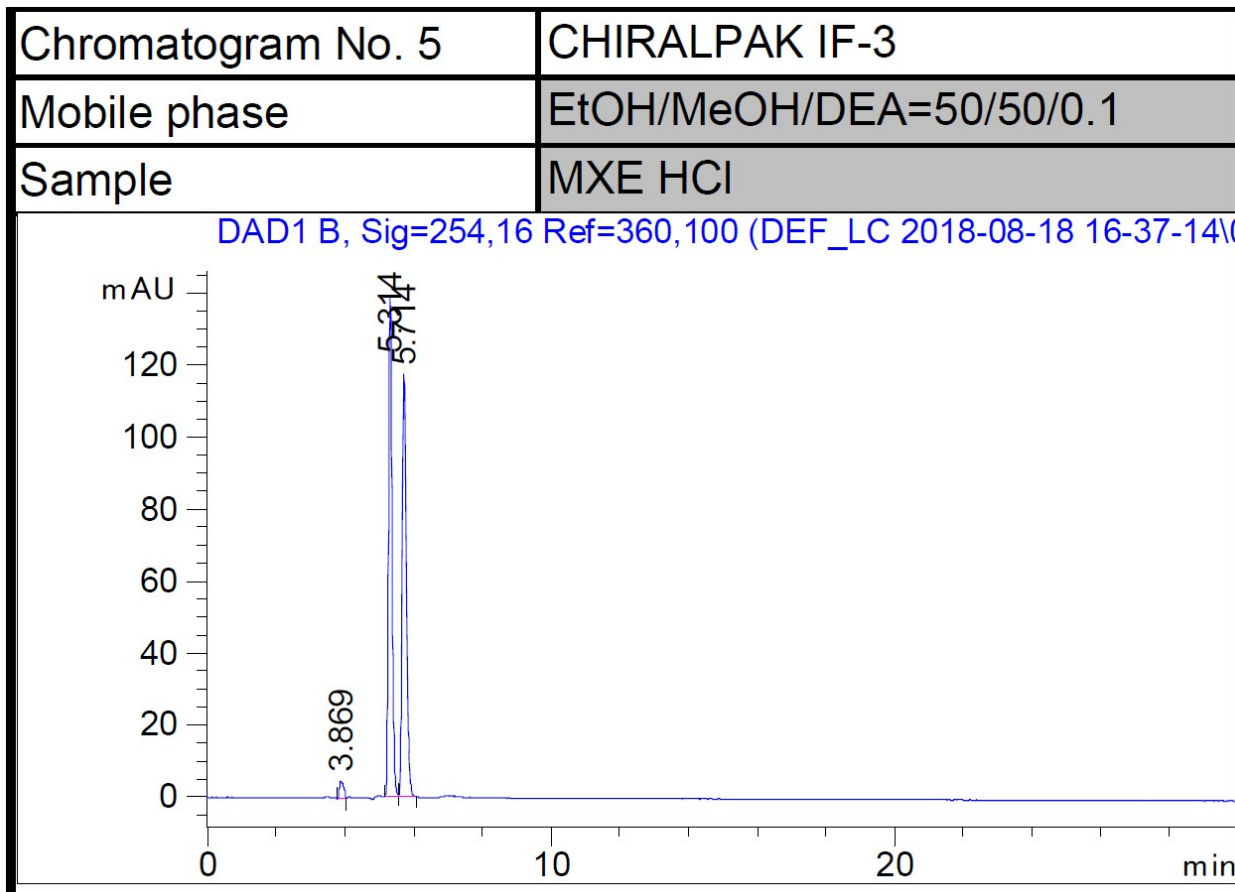

**Figure S3.** Chromatogram of enantiomers of (*rac*)-MXE HCl salt form resolved on CHIRALPAK® IF-3 stationary phase using ethanol/methanol/diethylamine (50/50/0.1) as a mobile phase.

Sample Info : CHIRALPAK IF-3, 4.6\*150 mm  
MP: EtOH/MeOH/DEA=50/50/0.1  
Flow rate: 0.5ml/min  
Sample conc. 1.5~1.8mg/mL in EtOH

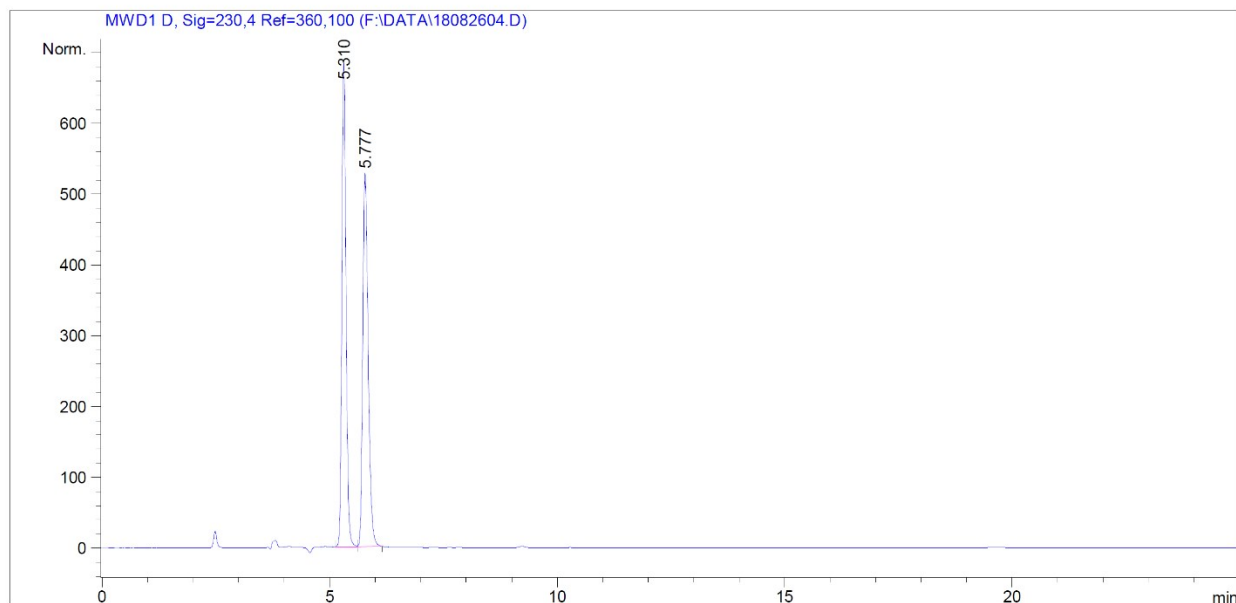

**Figure S4.** Chromatograms of enantiomers of (*rac*)-MXE free base form resolved on CHIRALPAK® IF-3 stationary phase using ethanol/methanol/diethylamine (50/50/0.1) as a mobile phase.

**A**

Sample Info : CHIRALPAK IF-3, 4.6\*150 mm  
MP: EtOH/MeOH/DEA=50/50/0.1  
Flow rate: 0.5ml/min  
Sample conc. 1.5~1.8mg/mL in EtOH

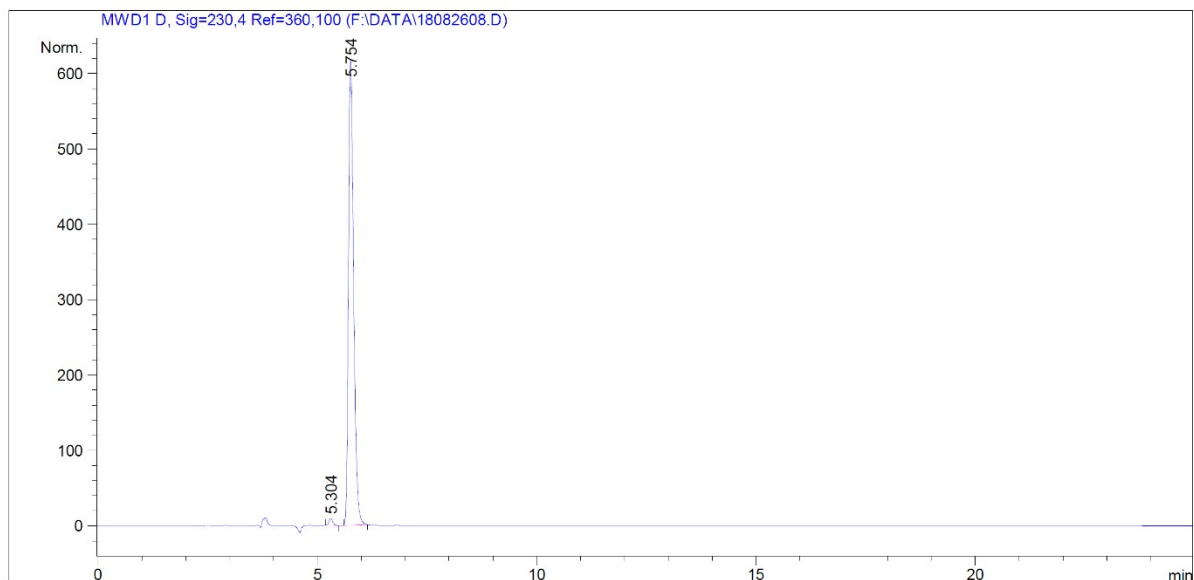**B**

Sample Info : CHIRALPAK IF-3, 4.6\*150 mm  
MP: EtOH/MeOH/DEA=50/50/0.1  
Flow rate: 0.5ml/min  
Sample conc. 1.5~1.8mg/mL in EtOH

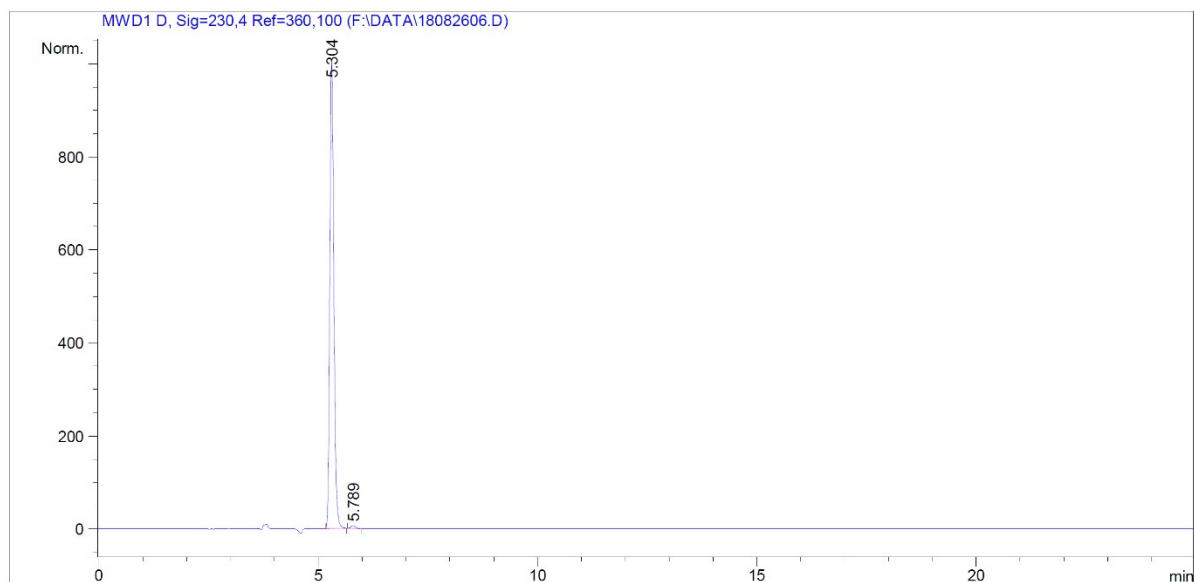

**Figure S5.** Chromatograms of enantiopure MXE salts with L(-)-DTTA or D-(+)-DTTA showing different retention times on CHIRALPAK® IF-3 stationary phase using ethanol/methanol/diethylamine (50/50/0.1) as a mobile phase: A) L(-)-DTTA MXE salt; B) D-(+)-DTTA MXE salt.

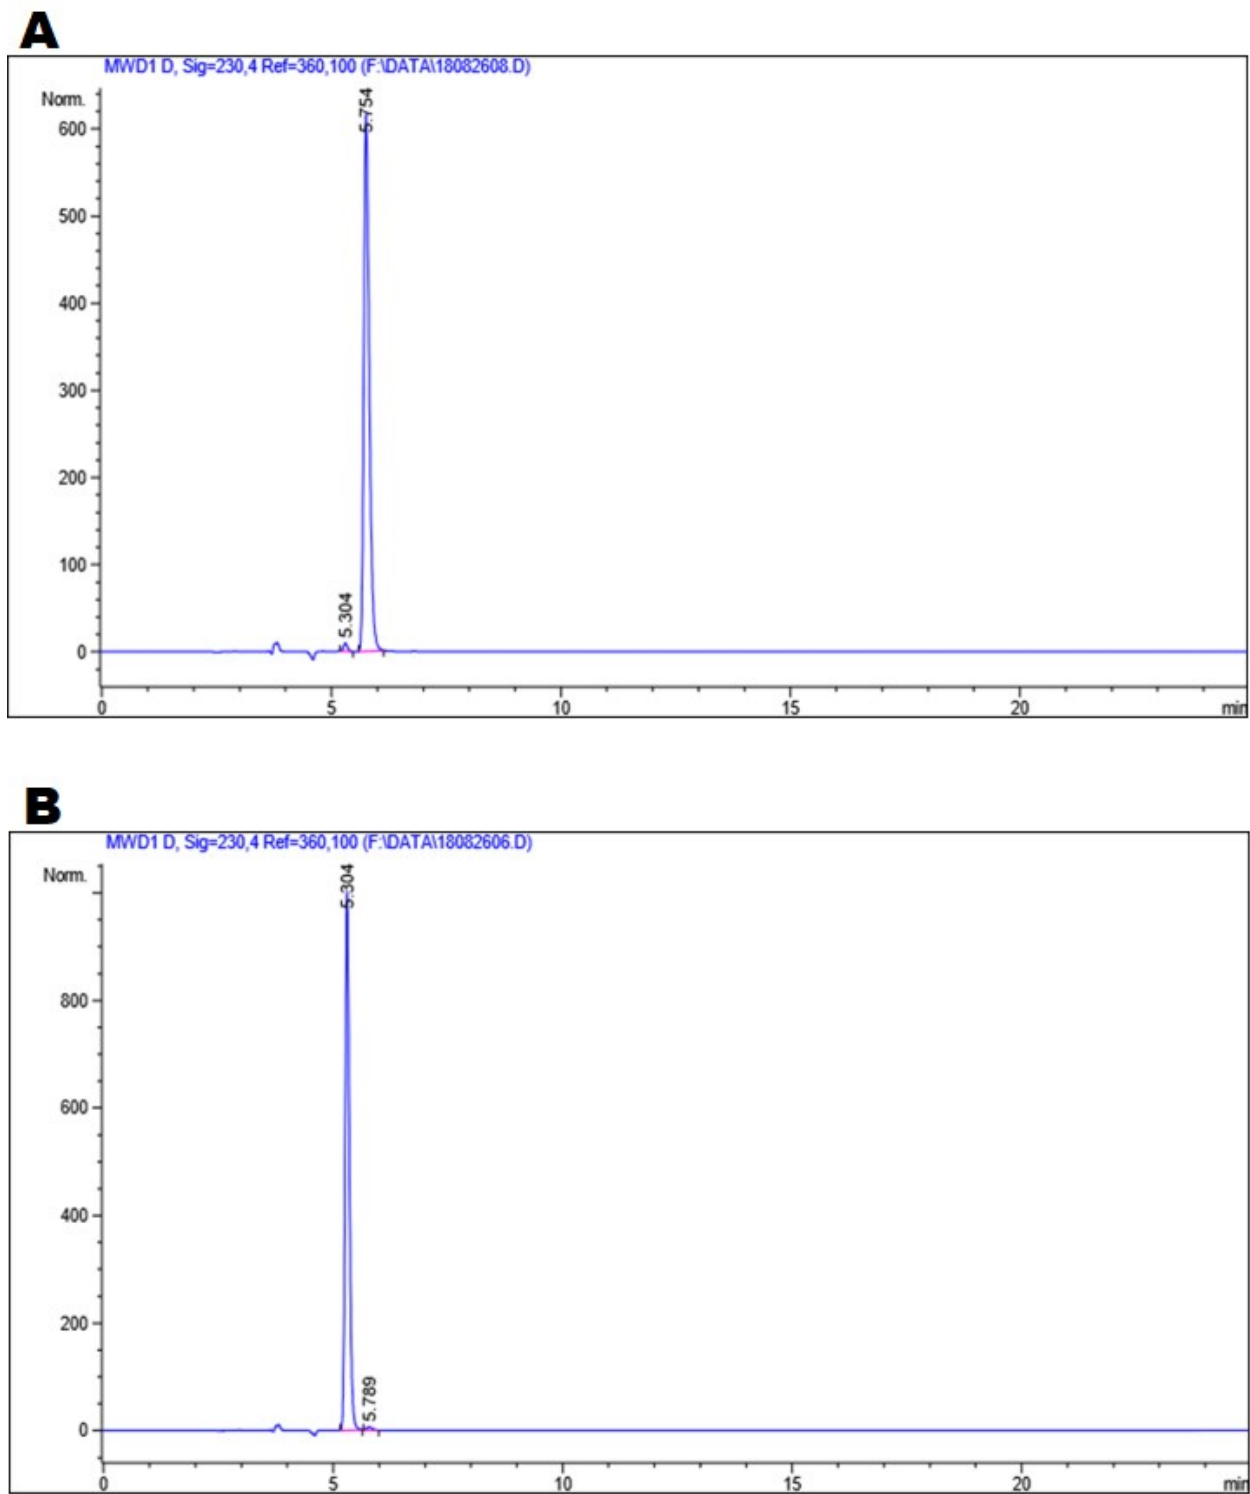

**Figure S6.** Analytical chiral HPLC chromatograms of the isolated crystals: A) Chromatogram for the obtained enantiopure (*R*)-(-)-MXE HCl; B) Chromatogram for the obtained enantiopure (*S*)-(+)-MXE HCl.

## SMD MODEL

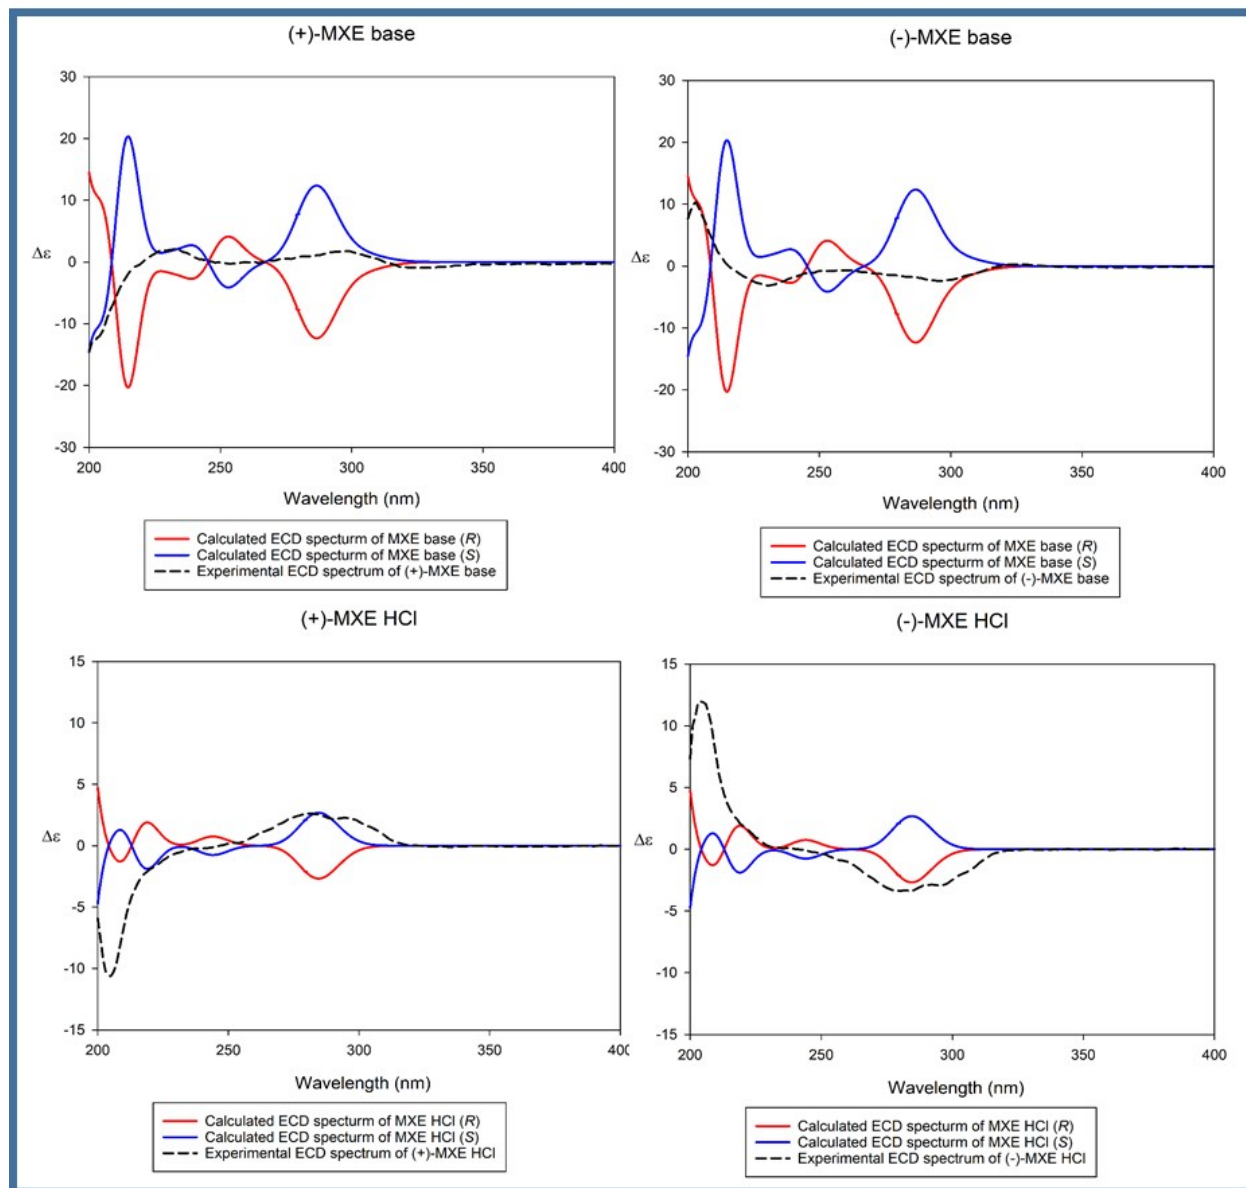

**Figure S7.** Comparison of experimental and calculated electronic circular dichroism (ECD) spectra of isolated stereoisomers of MXE free base and their HCl forms using solvation model based on density (SMD).



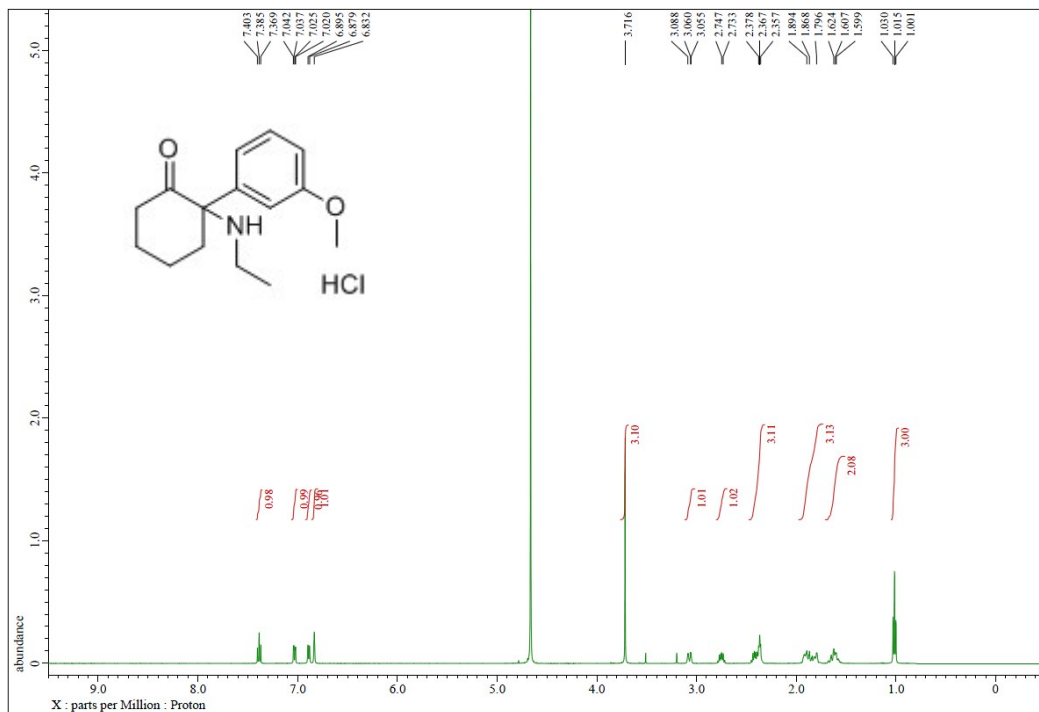

**<sup>1</sup>H NMR spectrum of (rac)-MXE HCl**

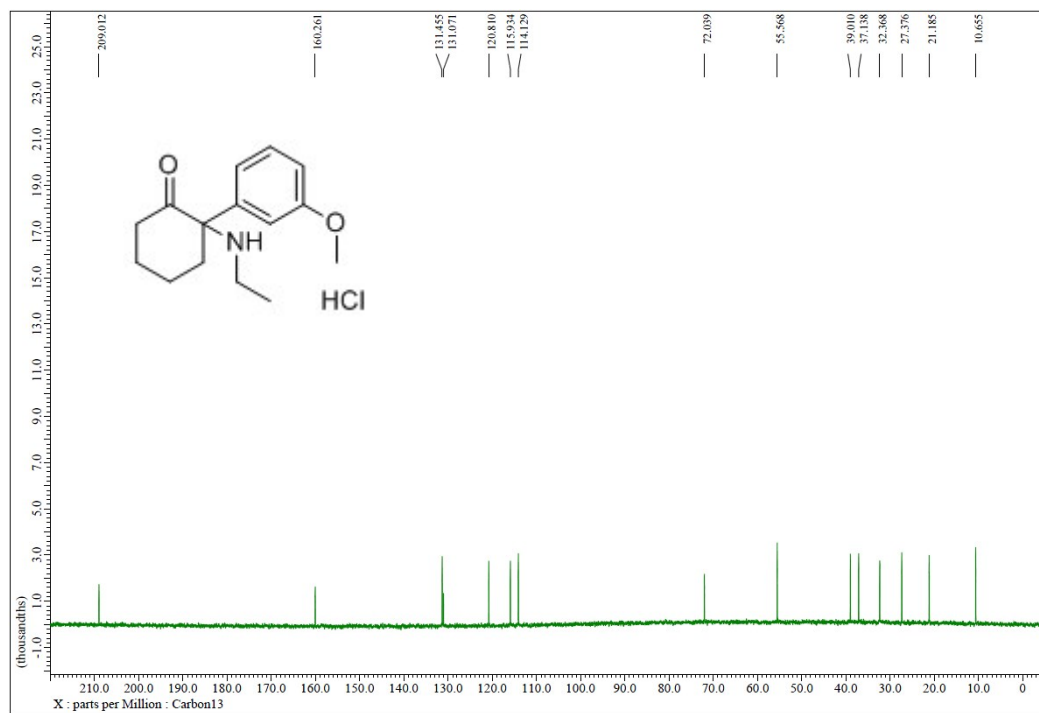

**<sup>13</sup>C NMR spectrum of compound (rac)-MXE HCl**

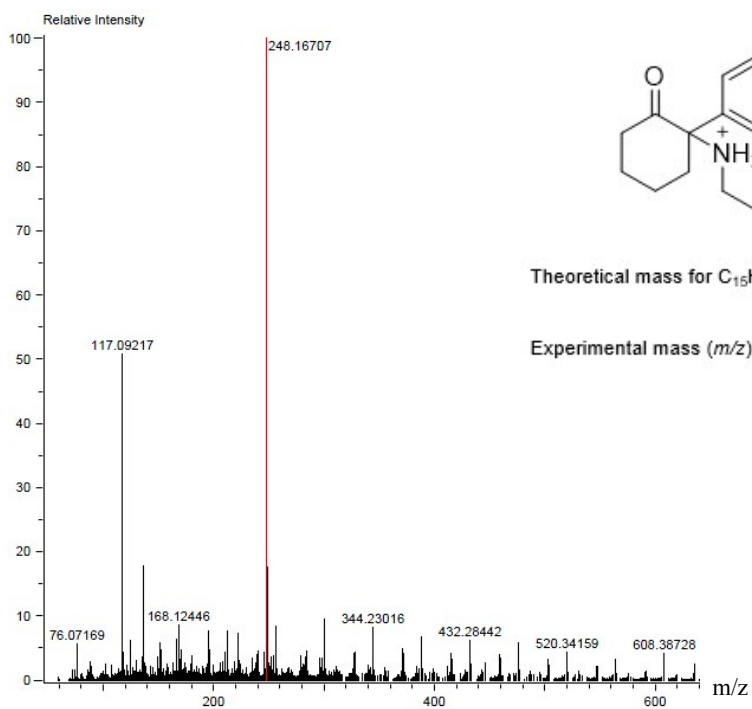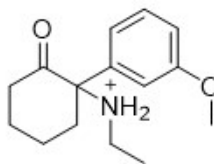

Theoretical mass for  $C_{15}H_{22}NO_2^+$  ( $[M+H]^+$ ) : 248.1645

Experimental mass ( $m/z$ ) : 248.1677

HRMS data of (*rac*)-MXE HCl

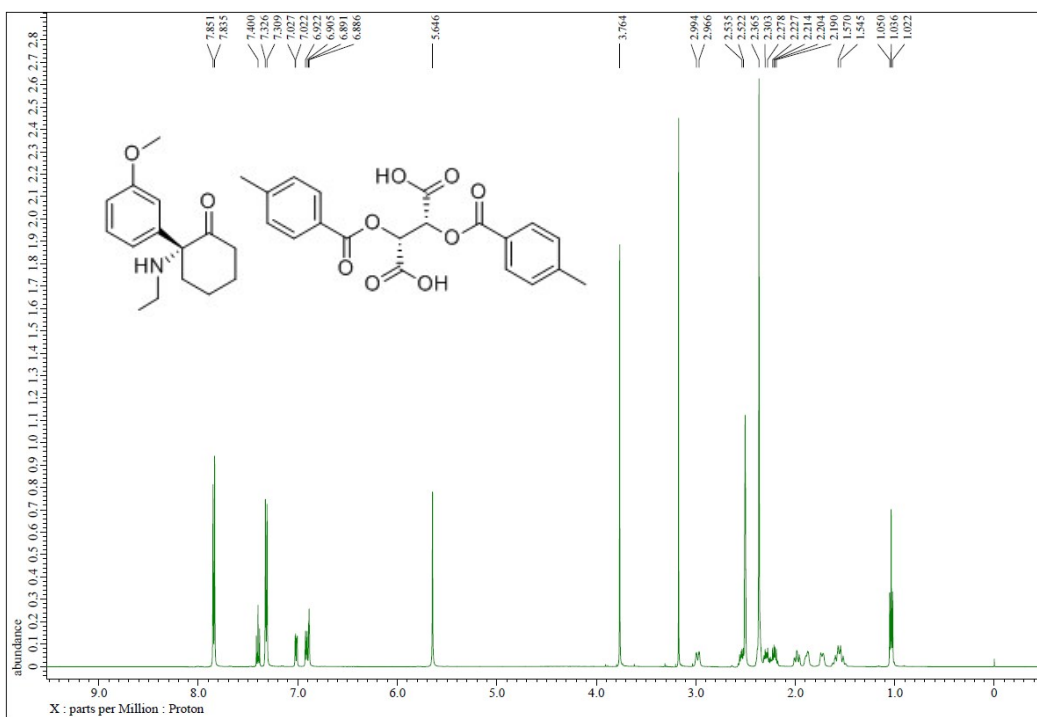

$^1\text{H}$  NMR spectrum of (*R*)-MXE L-DTTA salt

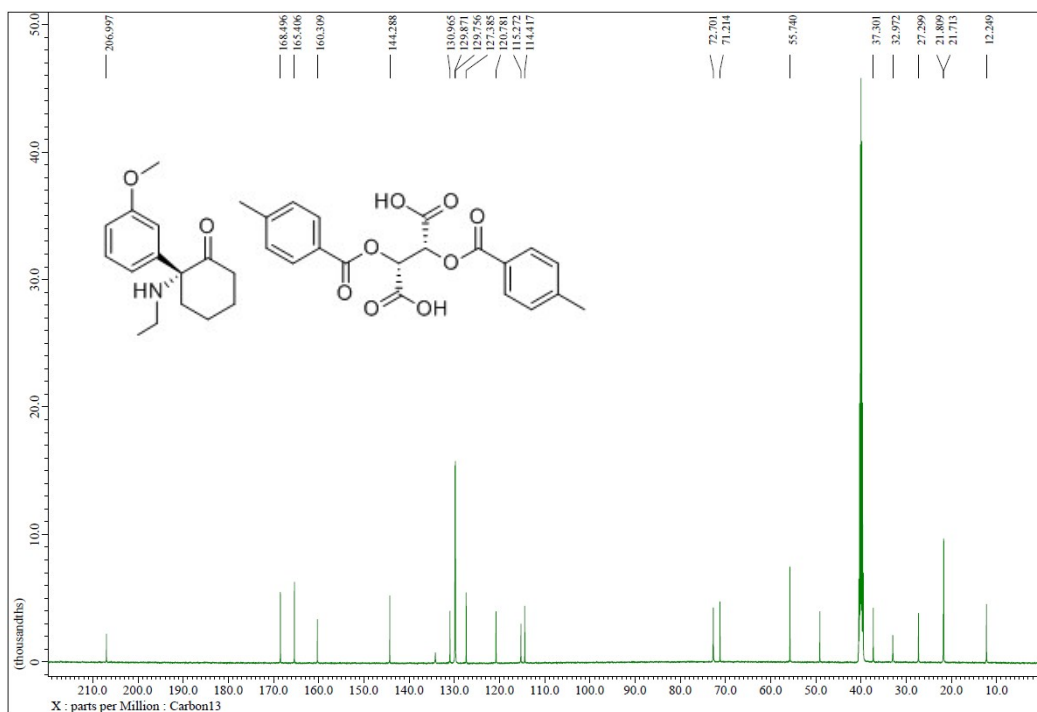

$^{13}\text{C}$  NMR spectrum of (*R*)-MXE L-DTTA salt

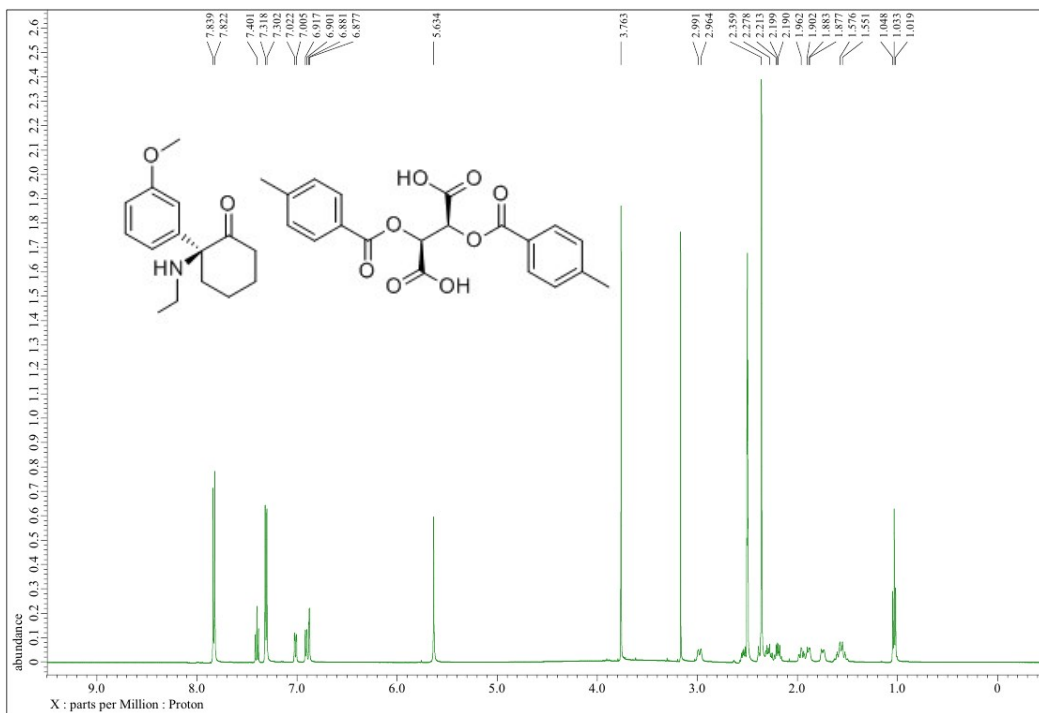

<sup>1</sup>H NMR spectrum of (S)-MXE D-DTTA salt

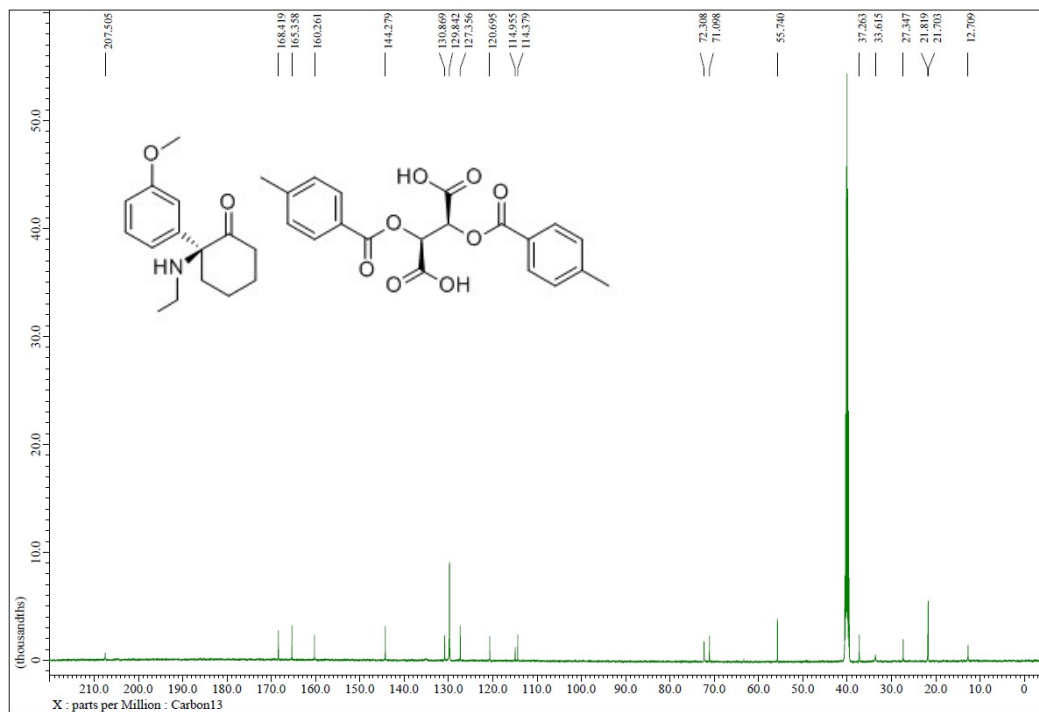

<sup>13</sup>C NMR spectrum of (S)-MXE D-DTTA salt

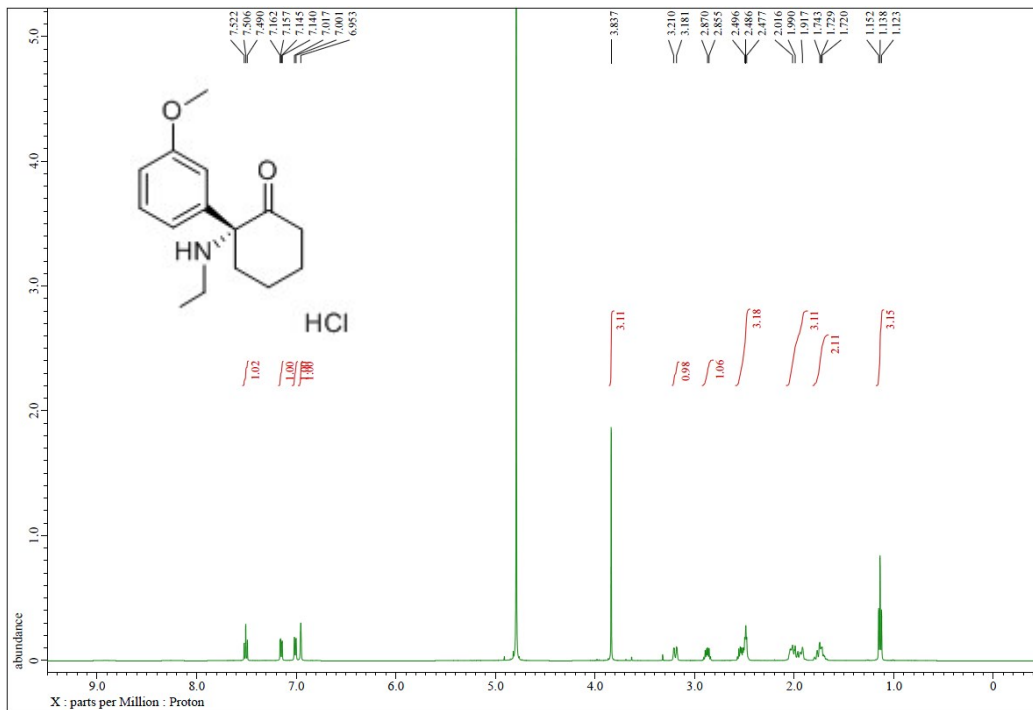

<sup>1</sup>H NMR spectrum of compound (R)-MXE HCl

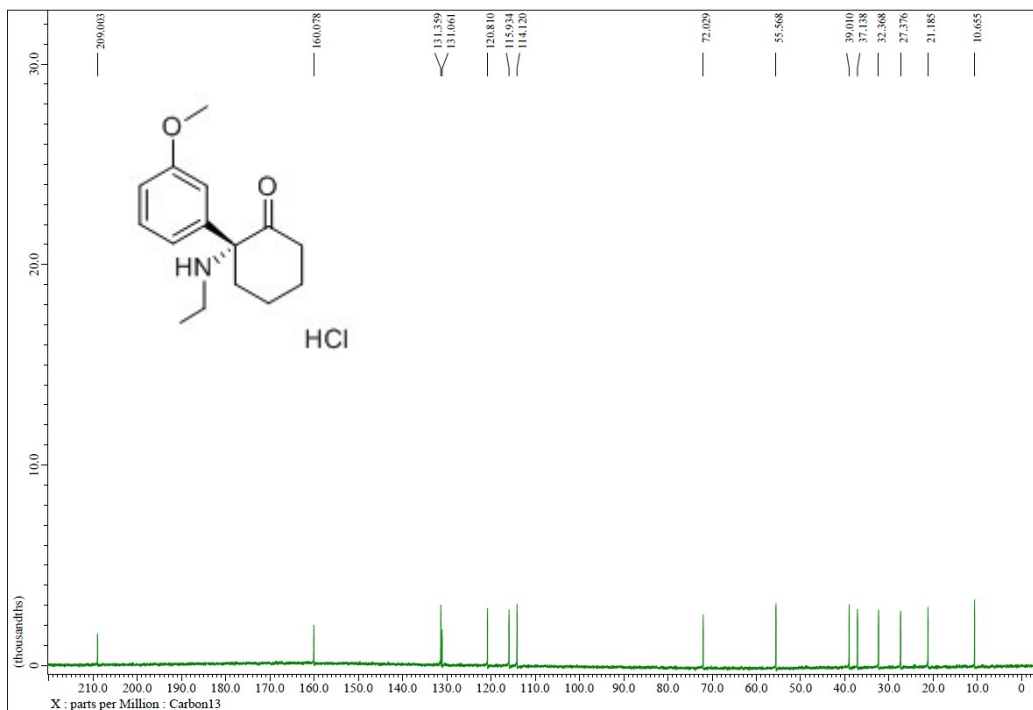

<sup>13</sup>C NMR spectrum of compound (R)-MXE HCl

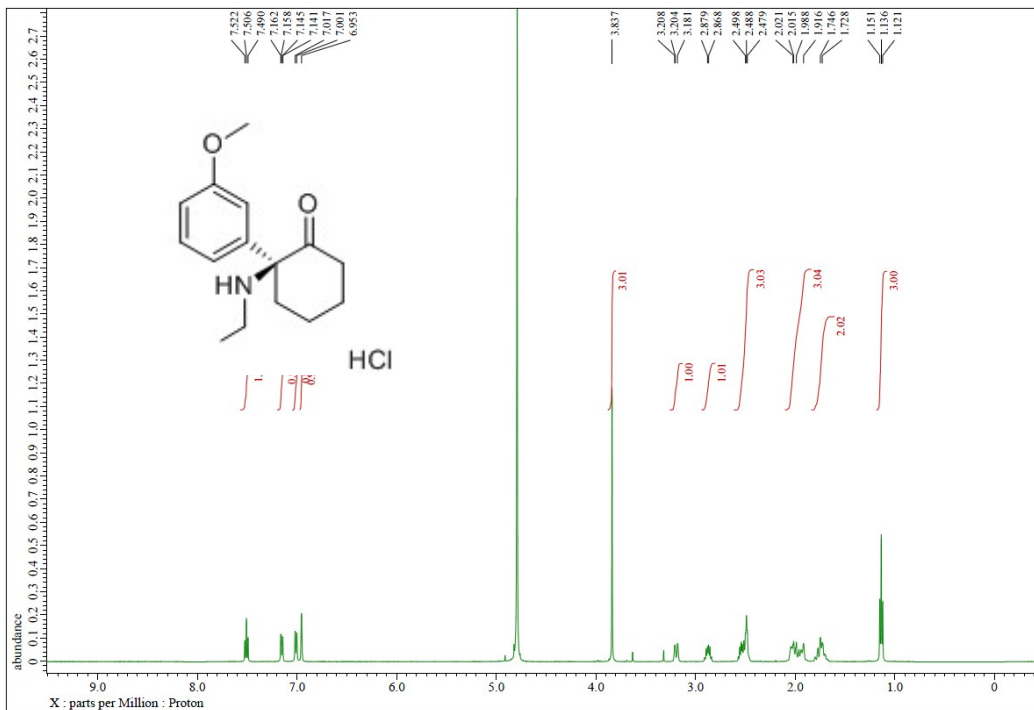

**<sup>1</sup>H NMR spectrum of compound (S)-MXE HCl**

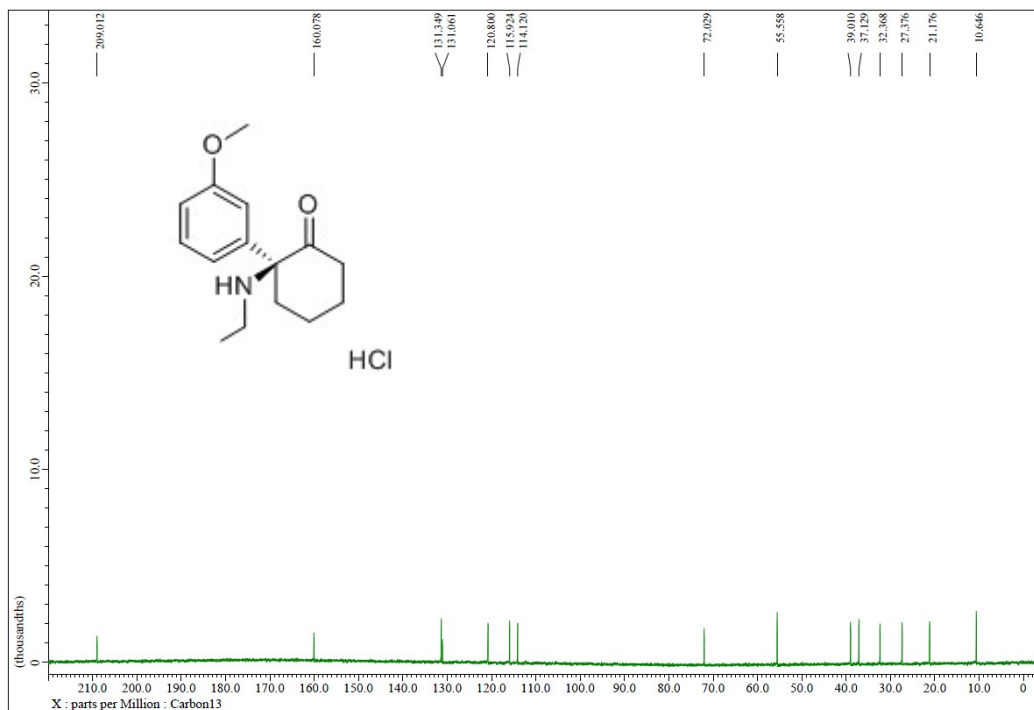

**<sup>13</sup>C NMR spectrum of compound (S)-MXE HCl**
